# Supplementary material for: Hydropinotherapy with Sulphurous Mineral Water as Complementary Treatment to Improve Glucose Metabolism, Oxidative Status, and Quality of Life
Source: MDPI journal article supplement (doi:10.3390/antiox10111773), 2021-11-05
Supplement: s1 [file s1]

**Table S1– Chemical composition of sulphurous, carbogaseous,bicarbonate with calcium and magnesium natural mineral water of the Telese spa (Benevento-Italy).**

| <b>Chemical composition</b>                | <b>Concentration</b> |
|--------------------------------------------|----------------------|
| pH                                         | 6.08                 |
| fixed residue at 180°C (mg/L)              | 2080                 |
| iodide (mg/L)                              | <0.02                |
| hydrogen sulfide (H <sub>2</sub> S) (mg/L) | 11.7                 |
| sodium (mg/L)                              | 127                  |
| potassium (mg/L)                           | 19.8                 |
| calcium (mg/dL)                            | 505                  |
| magnesium (mg/L)                           | 83.4                 |
| lithium (mg/L)                             | 0.70                 |
| chloride (mg/L)                            | 194                  |
| iron (mg/L)                                | 0.04                 |
| bromide (mg/L)                             | 2.9                  |
| bicarbonate (mg/L)                         | 1962                 |
| sulphate (mg/L)                            | 37.1                 |
| silica (mg/L)                              | 17.1                 |
| carbon dioxide (mg/L)                      | 1680                 |

**Table S2– Reliability and Validity of SF-36**

|    |                                   | <b>Internal consistency<br/>reliability</b> | <b>Test-retest<br/>reliability</b> | <b>Concurrent<br/>Validity</b> |
|----|-----------------------------------|---------------------------------------------|------------------------------------|--------------------------------|
|    |                                   | <i>Cronbach's <math>\alpha</math></i>       | <i>ICC</i>                         |                                |
| PC | <b>Physical functioning</b>       | 0.837                                       | 0.930                              | 0.701                          |
|    | <b>Physical role functioning</b>  | 0.834                                       | 0.737                              | 0.840                          |
|    | <b>Body pain</b>                  | 0.827                                       | 0.808                              | 0.729                          |
|    | <b>General health perceptions</b> | 0.824                                       | 0.876                              | 0.664                          |
| MC | <b>Vitality</b>                   | 0.816                                       | 0.904                              | 0.789                          |
|    | <b>Social role functioning</b>    | 0.831                                       | 0.820                              | 0.744                          |
|    | <b>Emotional role functioning</b> | 0.827                                       | 0.742                              | 0.750                          |
|    | <b>Mental health</b>              | 0.821                                       | 0.821                              | 0.780                          |

ICC, Intra-class correlation; PC, physical component; MC, mental component

Logistic regression

Number of obs = 95

LR chi2(6) = 21.63

Prob > chi2 = 0.0014

Log likelihood = -51.704141

Pseudo R2 = 0.1730

| Group_SHT          | Coef.     | Std. Err. | z     | P> z  | [95% Conf. Interval] |          |
|--------------------|-----------|-----------|-------|-------|----------------------|----------|
| Age                | .021227   | .0234887  | 0.90  | 0.366 | -.0248099            | .067264  |
| BMI                | .0083429  | .064485   | 0.13  | 0.897 | -.1180453            | .1347312 |
| delta_Glycemia_2_0 | .0227688  | .0197814  | 1.15  | 0.250 | -.0160021            | .0615396 |
| Delta_ROMs         | .0369859  | .0154356  | 2.40  | 0.017 | .0067326             | .0672392 |
| N_drug             | .1643743  | .2104597  | 0.78  | 0.435 | -.2481191            | .5768678 |
| Sex                |           |           |       |       |                      |          |
| F                  | .3619755  | .530955   | 0.68  | 0.495 | -.6786773            | 1.402628 |
| _cons              | -2.058655 | 2.108171  | -0.98 | 0.329 | -6.190594            | 2.073284 |

Figure S1

Logistic regression

Number of obs = 95

LR chi2(6) = 21.63

Prob > chi2 = 0.0014

Log likelihood = -51.704141

Pseudo R2 = 0.1730

| Group_SHT          | Odds Ratio | Std. Err. | z     | P> z  | [95% Conf. Interval] |          |
|--------------------|------------|-----------|-------|-------|----------------------|----------|
| Age                | 1.021454   | .0239926  | 0.90  | 0.366 | .9754953             | 1.069578 |
| BMI                | 1.008378   | .0650252  | 0.13  | 0.897 | .8886558             | 1.144229 |
| delta_Glycemia_2_0 | 1.02303    | .020237   | 1.15  | 0.250 | .9841253             | 1.063473 |
| Delta_ROMs         | 1.037678   | .0160172  | 2.40  | 0.017 | 1.006755             | 1.069551 |
| N_drug             | 1.178655   | .2480595  | 0.78  | 0.435 | .780267              | 1.780453 |
| Sex                |            |           |       |       |                      |          |
| F                  | 1.436164   | .7625384  | 0.68  | 0.495 | .5072875             | 4.065872 |
| _cons              | .1276255   | .2690564  | -0.98 | 0.329 | .0020486             | 7.950895 |

Note: **\_cons** estimates baseline odds.

Fig. S1
